# Supplementary material for: Urchin-inspired spiky microparticles for enhanced mild photothermal antibacterial therapy and wound healing
Source: Royal Society of Chemistry journal article supplement (doi:10.1039/d5tb02388b), 2026-01-01
Supplement: d5tb02388b1.pdf [file d5tb02388b1.pdf]

## Supporting Information

### **Urchin-inspired spiky microparticles for enhanced mild photothermal antibacterial therapy and wound healing** Shuai

He,<sup>a</sup> Denver P. Linklater,<sup>b</sup> Zheyu Li,<sup>a</sup> Suyao Yin,<sup>a</sup> Zechang Li,<sup>a</sup> Shuai Xiang,<sup>a</sup> Zenglian Zong,<sup>a</sup> Liping Wen,<sup>c</sup> Saulius Juodkazis,<sup>d</sup> Elena P. Ivanova,<sup>e</sup> Lei Jiang<sup>c</sup> and Kai Sun<sup>\*a</sup>

a. State Key Laboratory of Urban-rural Water Resource and Environment, School of Environment, Harbin Institute of Technology, Harbin 150090, China

b. Department of Biomedical Engineering, Graeme Clarke Institute, The University of Melbourne, Parkville, VIC 3010, Australia

c. Technical Institute of Physics and Chemistry, Chinese Academy of Sciences, Beijing 100190, China

d. Optical Sciences Centre, Swinburne University of Technology, Hawthorn, VIC 3122, Australia

e. STEM College, RMIT University, Melbourne, VIC 3001, Australia

\*Corresponding Author: Kai Sun

E-mail: [ksun@hit.edu.cn](mailto:ksun@hit.edu.cn)

**This Supporting information include:**

**Fig. S1** (a) SEM images of SMPs, scale bar = 200 nm and (b) scale bar = 2  $\mu$ m.

**Fig. S2.** Size distribution of SMPs.

**Fig. S3** (a) UV-vis spectra of different concentration of hemin. (b) the linear relationship between A400 value and hemin concentration.

**Fig. S4** XPS survey scan of SMPs.

**Fig. S5** (a) TEM images of SMPs, scale bar = 500 nm, (b) scale bar = 100 nm and (c) scale bar = 20 nm.

**Fig. S6** The time-dependent photothermal image of PBS solution, AgNPs solution and hemin solution under 808 nm laser irradiation (0.75 W/cm<sup>2</sup>).

**Fig. S7** DSC curves of lauric acid (LA), stearic acid (SA) and SMPs.

**Fig. S8** (a) Bacterial colonies and (b) survival rates of *P.aeruginosa* after different treatments under NIR laser irradiation for 10 min. Data are presented as mean  $\pm$  SD, \*\*\*\*p < 0.0001 denote the statistical significance.

**Fig. S9** Bacterial plates from wound tissue at different dilution factors.

**Fig. S10** Immunohistochemical staining images of pro-inflammatory factors TNF- $\alpha$  and IL-1 $\beta$  in different regions.

**Fig. S11** The cytotoxicity assessment of SMPs under NIR laser irradiation (1 W/cm<sup>2</sup>) for 10 min.

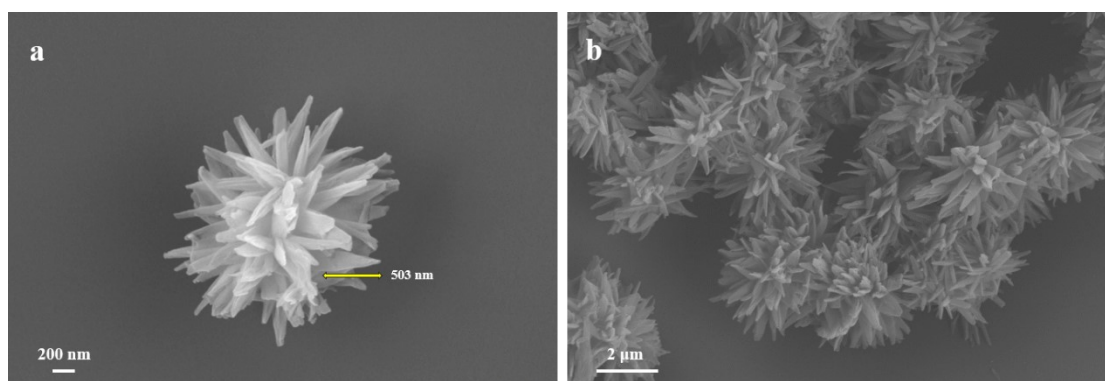

**Fig. S1** (a) SEM images of SMPs, scale bar = 200 nm and (b) scale bar = 2  $\mu\text{m}$ .

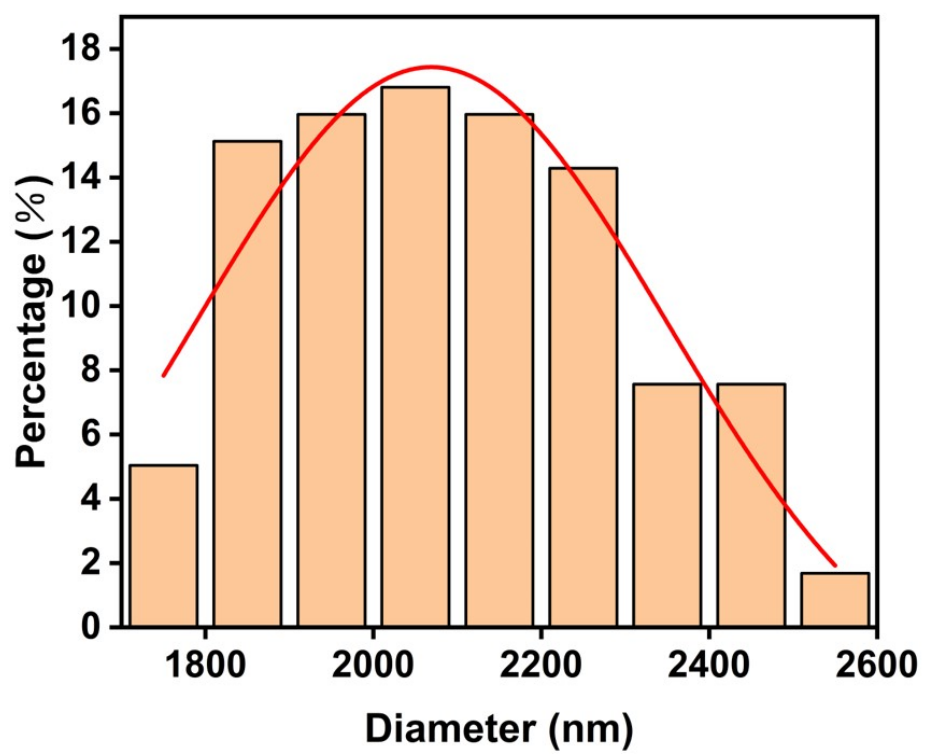

**Fig. S2** Size distribution of SMPs.

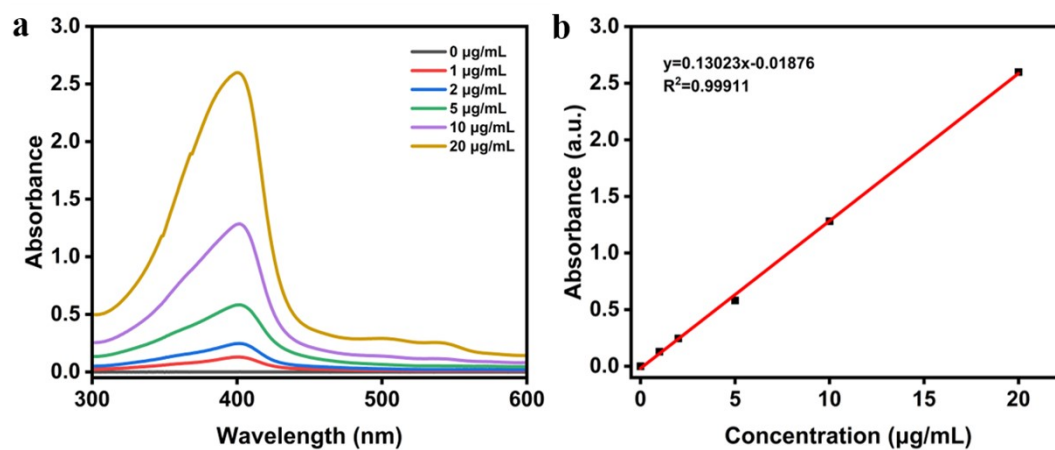

**Fig. S3** (a) UV–vis spectra of different concentration of hemin. (b) The linear relationship between A400 value and hemin concentration.

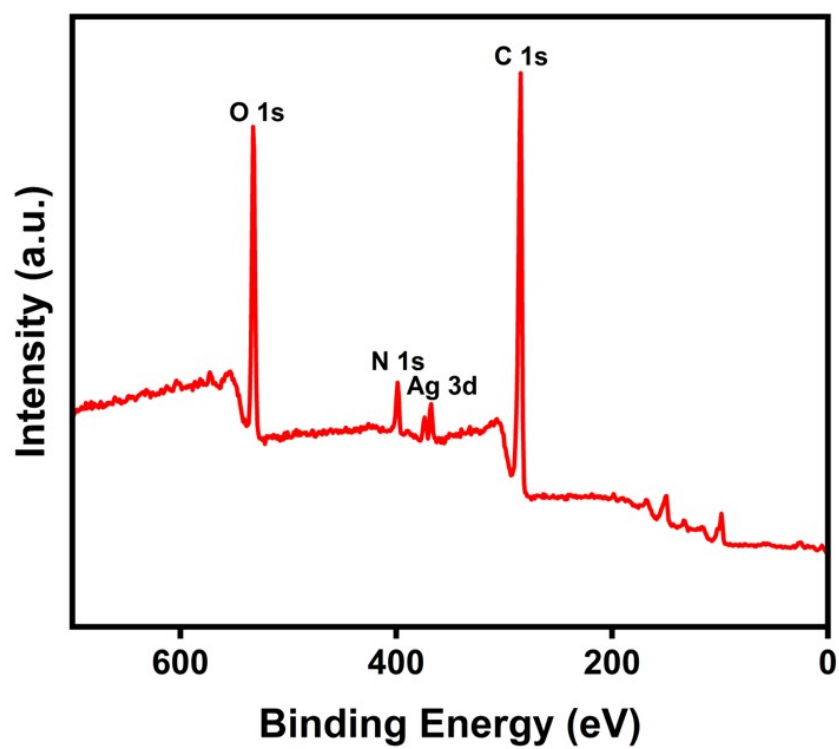

Fig. S4 XPS survey scan of SMPs.

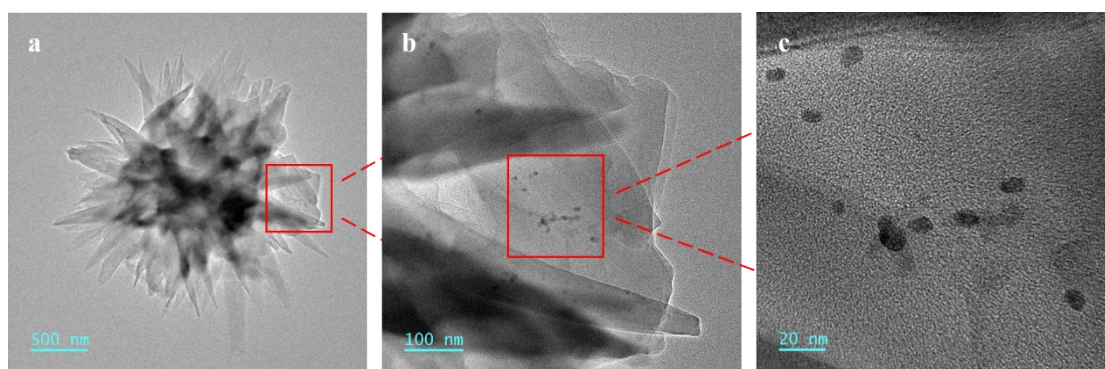

**Fig. S5** (a) TEM images of SMPs, scale bar = 500 nm, (b) scale bar = 100 nm and (c) scale bar = 20 nm.

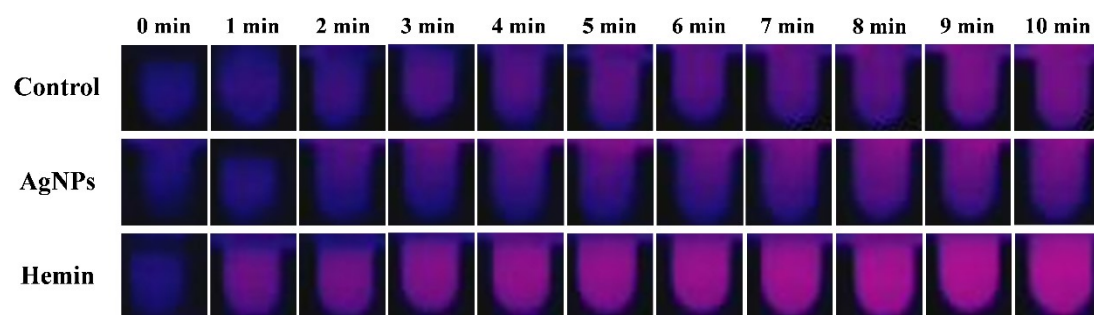

**Fig. S6** The time-dependent photothermal image of PBS solution, AgNPs solution and hemin solution under 808 nm laser irradiation ( $0.75 \text{ W/cm}^2$ ).



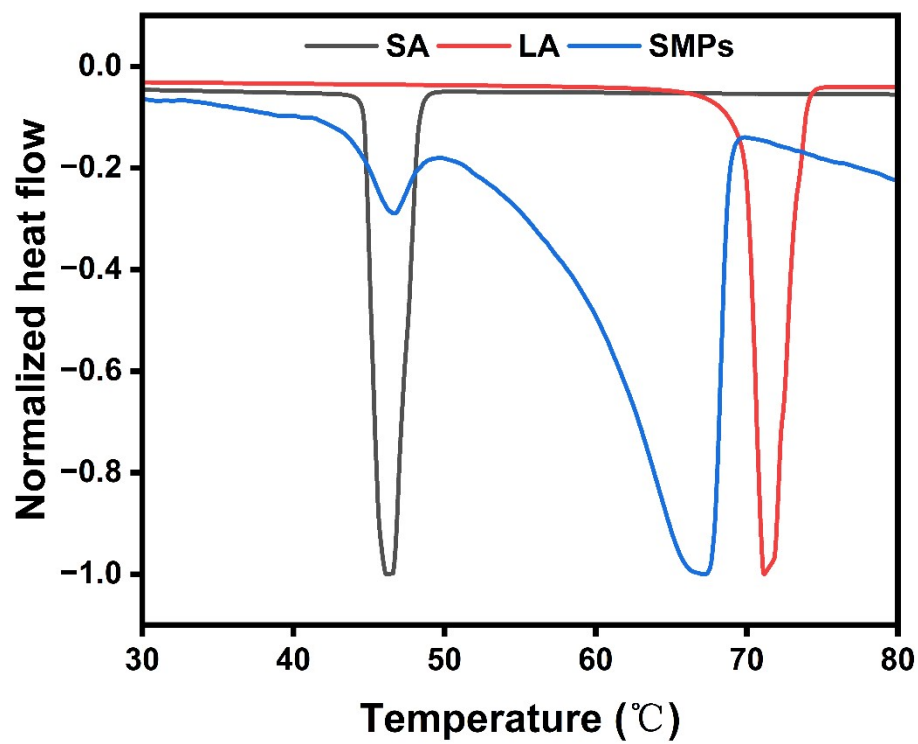

**Fig. S7** DSC curves of lauric acid (LA), stearic acid (SA) and SMPs.

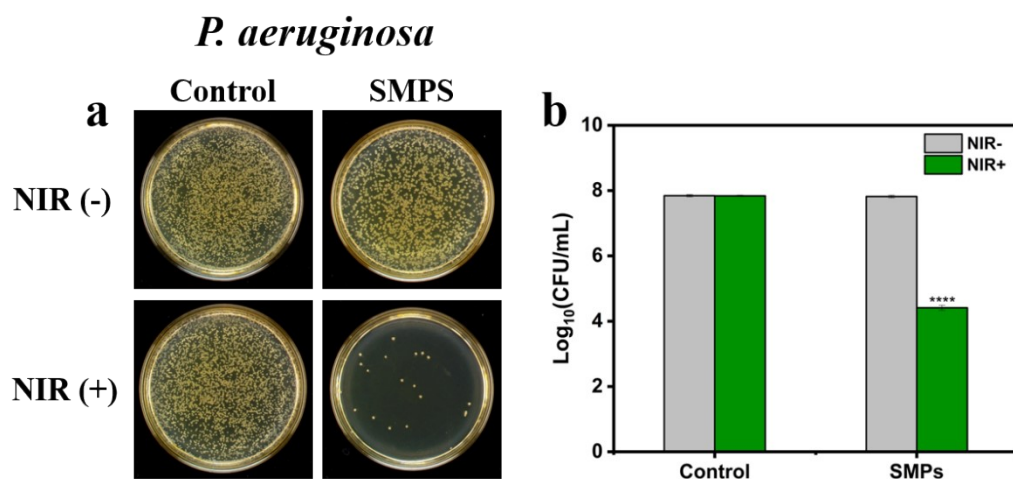

**Fig. S8** (a)Bacterial colonies and (b) survival rates of *P.aeruginosa* after different treatments under NIR laser irradiation for 10 min. Data are presented as mean  $\pm$  SD, \*\*\*\*p < 0.0001 denote the statistical significance.

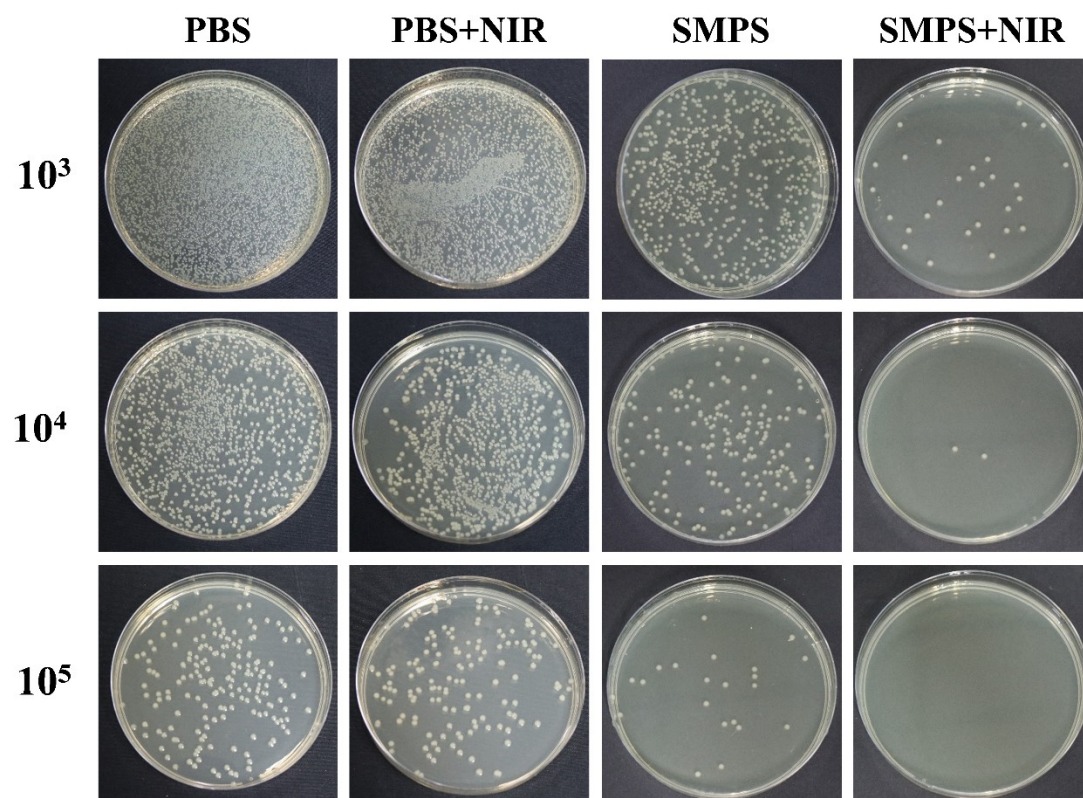

**Fig. S9** Bacterial plates from wound tissue at different dilution factors.

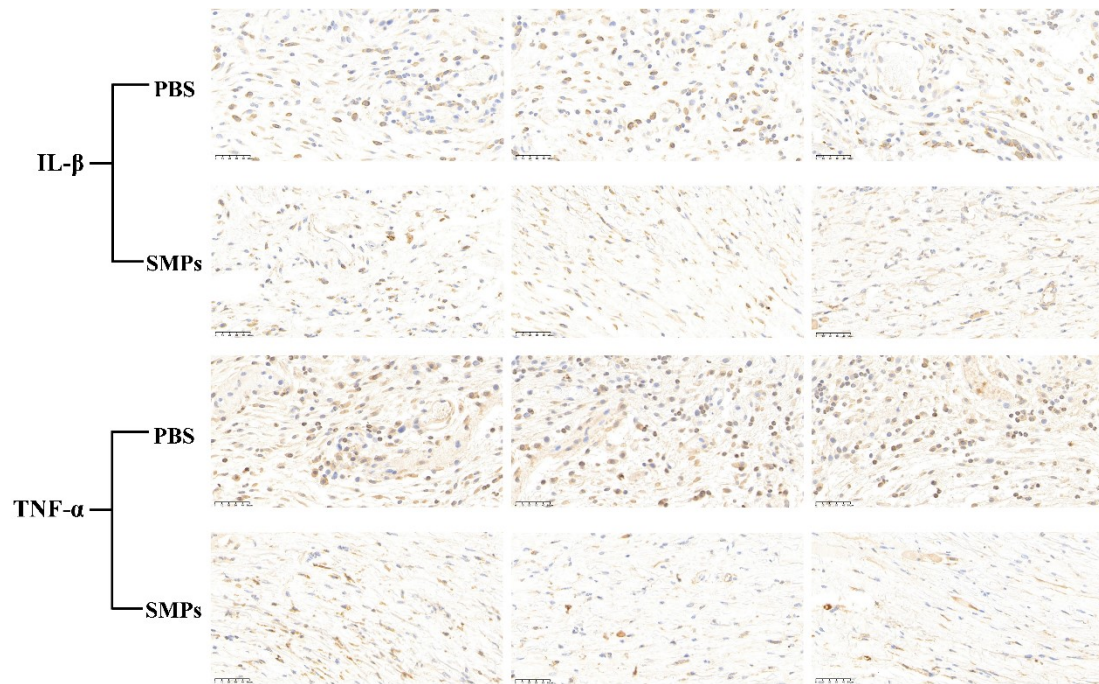

**Fig. S10** Immunohistochemical staining images of pro-inflammatory factors TNF- $\alpha$  and IL-1 $\beta$  in different regions.

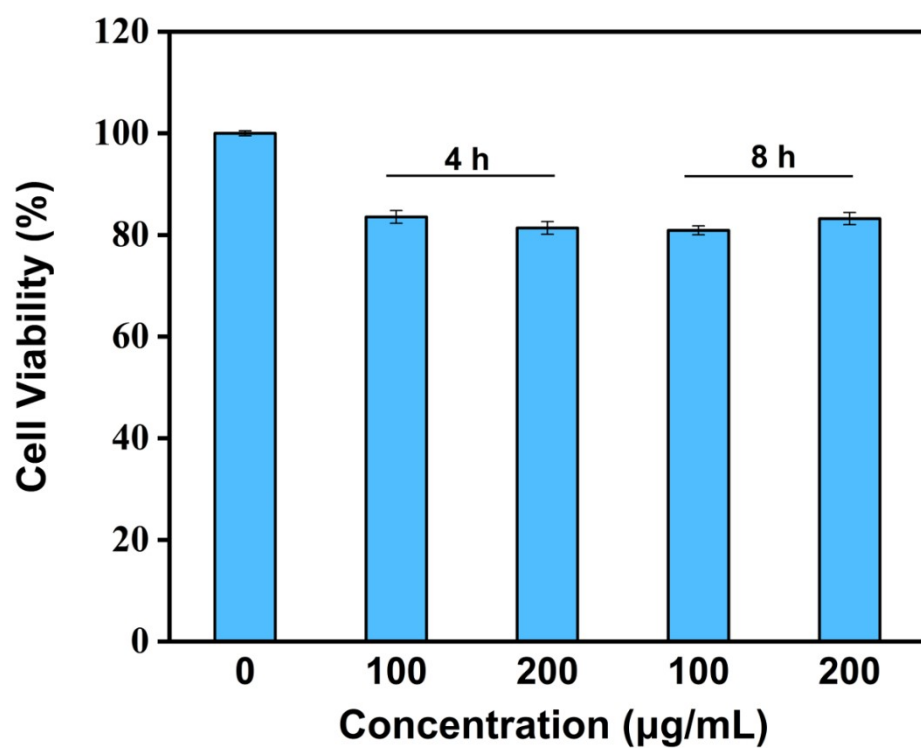

**Fig. S11** The cytotoxicity assessment of SMPs under NIR laser irradiation (1 W/cm<sup>2</sup>) for 10 min.
